# Supplementary material for: A macroecological description of alternative stable states reproduces intra- and inter-host variability of gut microbiome
Source: PubMed Central journal article supplement — Sci Adv. 2021 Oct 20;7(43):eabj2882. doi: 10.1126/sciadv.abj2882 (PMC8528411; doi:10.1126/sciadv.abj2882), 2021-10-20
Supplement: sciadv.abj2882_sm.pdf [file sciadv.abj2882_sm.pdf]

Supplementary Materials for

**A macroecological description of alternative stable states reproduces intra- and inter-host variability of gut microbiome**

Silvia Zaoli and Jacopo Grilli\*

\*Corresponding author. Email: [jgrilli@ictp.it](mailto:jgrilli@ictp.it)

Published 20 October 2021, *Sci. Adv.* **7**, eabj2882 (2021)  
DOI: [10.1126/sciadv.abj2882](https://doi.org/10.1126/sciadv.abj2882)

**This PDF file includes:**

Supplementary Information  
Figs. S1 to S14  
Table S1

# 1 Data

The data used in this study come from three different datasets: the Moving Picture (MP) dataset [20], the BIO-ML dataset [35] and the dataset from the study by David et al, called DA dataset in the following [3]. Raw data for MP and D were obtained from MGnify [36], under project IDS MGYS00002184 and MGYS00001278, while for BIO-ML they were obtained from NCBI, under project ID PRJNA544527.

The MP dataset contains time-series of stool samples from two individuals, M3 (male) and F4 (female). M3 is sampled for  $\sim 1$  year while F4 for  $\sim 6$  months, with approximately daily sampling frequency. For the BIO-ML dataset, we considered the time-series of stool samples of 10 individuals (those with long and dense time-series): ae, am, an, ao, ba, bc, bh, bj, cl, co. The length of the time series varies from 6 months to 1.5 years, and the density varies (daily in the densest series). The DA dataset contains time-series of stool samples from two individuals, A and B. The two individuals are sampled over approximately 1 year with approximately daily sampling frequency.

Raw 16S sequences were processed with QIIME. The reads were initially processed with the `split_libraries_fastq.py` script with default parameters, then OTUs were picked using the script `pick_closed_reference_otus.py`, relying on UCLUST, with the Greengenes database at 97% similarity level as reference. We excluded samples with less than  $10^4$  reads (13 samples in A and 6 samples in B), those with more than half sequences unassigned (one sample in A and one in B) and the samples identified as mislabelled in the original studies.

For individuals A and B from the DA dataset we consider two separate time series before and after the perturbation period (see Methods, section A): for individual A we consider the pre-travel (days 0 to 70) and post-travel (days 123 to 364) periods, and for individual B the pre-*Salmonella* (days 0 to 150) and post-*Salmonella* (days 160 to 252) periods. We note that, according to the original study [3], individual A after the perturbation period goes back to the pre-travel state, while individual B has a different composition post- *Salmonella*.

# 2 OTU selection

For the analyses reported in Fig. 2 and in Fig. S5C and S8, we used OTUs with average relative abundance  $> 10^{-4}$ . This choice is due to the fact that the estimation of  $\Phi_i(T)$  is extremely noisy for rare OTU. Results are however similar for different thresholds (we tested  $10^{-5}$ ,  $10^{-3}$ ,  $10^{-2}$ ).

For the analyses reported in Fig. 3 and 4, instead, we do not use this threshold as it would bias the correlation of parameters across-individuals. In fact, if we restricted ourselves to OTUs above a threshold abundance in both individuals we would bias towards OTUs that have a similar abundance in the two individuals. However, also keeping all OTUs for which we can estimate the parameters  $K$  and  $\sigma$  would bias the results. In fact, among the very rare OTUs we only observe those with high  $\sigma$  (the others are either not observed or have too low counts to estimate  $\sigma$  and  $K$ ), see Fig. S1. Therefore, including OTUs that are too rare would yield a biased correlation of  $\sigma$  across-individuals, as the rare OTUs that are observed in both individuals tend to have high values

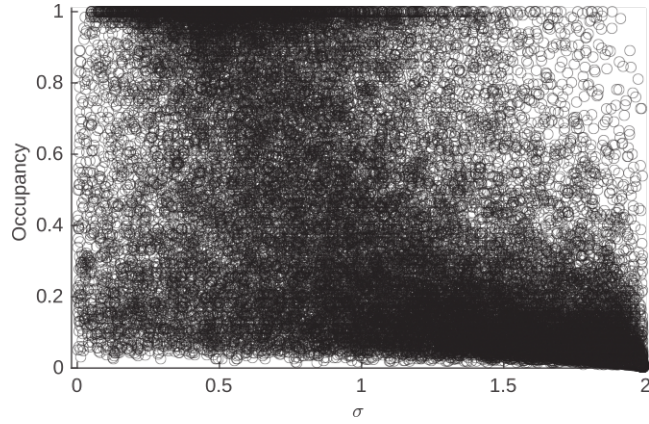

Figure S1: Observed OTUs with low occupancy (fraction of samples where they are observed) are biased towards high  $\sigma$ .

of this parameter. Based on the scatter plot of  $\sigma$  and occupancy in Fig. S1, we therefore keep for the analysis all OTUs with occupancy  $> 0.2$  (and for which it is possible to estimate  $\sigma$  and  $K$ ).

### 3 Estimate of $\Phi_i$ from sampled counts

We want to obtain an estimate of the dissimilarity

$$\Phi_i(t, T) = \left( \frac{\lambda_i(t) - \lambda_i(t+T)}{\lambda_i(t) + \lambda_i(t+T)} \right)^2 \quad (1)$$

from sampled counts  $x_i(t)$  and  $x_i(t+T)$ . The counts  $x_i(t)$  are a binomial random variable with success probability  $\lambda_i(t)$  and number of extractions  $N(t)$ . When  $N(t) \gg 1$  and  $\lambda_i(t) \ll 1$ , they can be approximated by a Poisson random variable with rate  $\lambda_i(t)N(t)$ .

If we define  $d_i(t, T) = x_i(t) - x_i(t+T)$  and  $s_i(t, T) = x_i(t) + x_i(t+T)$ , we can prove (see below) that the average of  $d_i^2$  over different realisations of the sampling constrained to a fixed  $s_i$  is

$$\langle d_i^2 | s_i \rangle = s_i(s_i - 1) \left( \frac{\lambda_i(t)N(t) - \lambda_i(t+T)N(t+T)}{\lambda_i(t)N(t) + \lambda_i(t+T)N(t+T)} \right)^2 + s_i. \quad (2)$$

If the number of sampled sequences are the same at the two times (which can be obtained simply downsampling the sample with larger  $N$ ), we have

$$\langle d_i^2 | s_i \rangle = s_i(s_i - 1) \left( \frac{\lambda_i(t) - \lambda_i(t+T)}{\lambda_i(t) + \lambda_i(t+T)} \right)^2 + s_i, \quad (3)$$

that is, for  $s_i > 1$ ,

$$\Phi_i(t, T) = \frac{\langle d_i^2 | s_i \rangle - s_i}{s_i(s_i - 1)} = \left\langle \frac{d_i^2 - s_i}{s_i(s_i - 1)} \middle| s_i \right\rangle, \quad (4)$$

corresponding to Eq. (2) of the main text.

Let us now prove (2). Let  $d = x_1 - x_2$ ,  $s = x_1 + x_2$  where  $x_1$  and  $x_2$  are Poisson variables with rates  $\mu_1$  and  $\mu_2$ .

The constrained moments of  $d$  can be obtained from the derivatives of the constrained generating function

$$H_{d|s}(v) = \sum_d P(d|s) e^{vd} = \sum_d \frac{P(d, s)}{P(s)} e^{vd} = \frac{1}{P(s)} \sum_d P(d, s) e^{vd}. \quad (5)$$

$P(s)$  is simply the probability of the sum of two Poisson variables with rates  $\mu_1$  and  $\mu_2$ , which is itself a Poisson variable with rate  $\mu_1 + \mu_2$ .

The quantity  $\sum_d P(d, s)e^{vd}$  can be also computed explicitly using the moment generating function of  $d$  and  $s$ :

$$\begin{aligned} H_{d,s}(v, u) &= \sum_{d,s} P(d, s)e^{vd}e^{us} = \sum_{d,s} P(x_1)P(x_2)\delta(x_1 + x_2, d)\delta(x_1 + x_2, s)e^{vd}e^{us} \\ &= \sum_{x_1, x_2} P(x_1)P(x_2)e^{v(x_1-x_2)}e^{u(x_1+x_2)} = \sum_{x_1} P(x_1)e^{v+u} \sum_{x_2} P(x_1)e^{u-v} \\ &= G_{\mu_1}(u+v)G_{\mu_2}(u-v), \end{aligned} \quad (6)$$

where  $G_\mu(h)$  is the Poisson moment generating function. This can be computed easily:

$$G_\mu(h) = \sum_{x=0}^{\infty} P(x)e^{hx} = \sum_{x=0}^{\infty} \frac{\mu^x}{x!} e^{hx-\mu} = e^{-\mu} \sum_{x=0}^{\infty} \frac{(\mu e^h)^x}{x!} = e^{-\mu} e^{\mu e^h} = e^{\mu(e^h-1)} \quad (7)$$

Substituting this result in the expression for  $H_{d,s}$  we get

$$\begin{aligned} H_{d,s}(v, u) &= e^{\mu_1(e^{u+v}-1)}e^{\mu_2(e^{u-v}-1)} = e^{e^u(\mu_1 e^v + \mu_2 e^{-v}) - \mu_1 - \mu_2} = e^{(\mu_1 e^v + \mu_2 e^{-v})(e^u - 1) + \mu_1 e^v + \mu_2 e^{-v} - \mu_1 - \mu_2} \\ &= G_{\mu_1 e^v + \mu_2 e^{-v}}(u) e^{\mu_1 e^v + \mu_2 e^{-v} - \mu_1 - \mu_2}. \end{aligned} \quad (8)$$

Writing  $H_{d,s}(u, v)$  in this form is useful because if we call  $F^{-1}$  the inverse operation to taking the generating function, we have

$$\begin{aligned} \sum_d P(d, s)e^{vd} &= F_u^{-1}\left(\sum_{d,s} P(d, s)e^{vd}e^{us}\right) = F_u^{-1}(H_{d,s}(u, v)) = F_u^{-1}(G_{\mu_1 e^v + \mu_2 e^{-v}}(u) e^{\mu_1 e^v + \mu_2 e^{-v} - \mu_1 - \mu_2}) \\ &= F_u^{-1}(G_{\mu_1 e^v + \mu_2 e^{-v}}(u) e^{\mu_1 e^v + \mu_2 e^{-v} - \mu_1 - \mu_2}) = \frac{(\mu_1 e^v + \mu_2 e^{-v})^s}{s!} e^{-\mu_1 e^v - \mu_2 e^{-v}} e^{\mu_1 e^v + \mu_2 e^{-v} - \mu_1 - \mu_2} \\ &= \frac{(\mu_1 e^v + \mu_2 e^{-v})^s}{s!} e^{-\mu_1 - \mu_2}. \end{aligned} \quad (9)$$

Substituting this result in Eq. (5) we finally obtain the expression for the conditional generating function

$$H_{d|s}(v) = \frac{s!}{(\mu_1 + \mu_2)^s} e^{\mu_1 + \mu_2} \frac{(\mu_1 e^v + \mu_2 e^{-v})^s}{s!} e^{-\mu_1 - \mu_2} = \left( \frac{\mu_1 e^v + \mu_2 e^{-v}}{\mu_1 + \mu_2} \right)^s \quad (10)$$

We can thus compute conditioned moments:

$$\begin{aligned} \langle d \rangle_s &= \frac{dH}{dv} \Big|_{v=0} = s \frac{\mu_1 - \mu_2}{\mu_1 + \mu_2} \\ \langle d^2 \rangle_s &= \frac{d^2 H}{dv^2} \Big|_{v=0} = s(s-1) \left( \frac{\mu_1 - \mu_2}{\mu_1 + \mu_2} \right)^2 + s, \end{aligned}$$

which corresponds to equation 2.

## 4 The time average of the averages over realisations is approximated by time average of single realisations

Let  $[\cdot]$  denote the average over time, i.e.  $[X] := \frac{1}{T} \sum_t x_t$ , and  $\langle \cdot \rangle$  denote the average over realisations. We want to show that  $[\langle X \rangle] \rightarrow [X]$  when  $T \rightarrow \infty$ . To do that, we can show that the generating function of the two variables are equal in that limit.

$[X]$  is a stochastic variable with generating function  $H_{[X]}(h) = \sum_{[X]} P([X]|\{p_1, \dots, p_T\})e^{h[X]}$ . Instead,  $[\langle X \rangle]$  is deterministic, but we can think of it as a stochastic variable delta distributed around its value, with generating function  $F(h) = \sum_x \delta(x, [\langle X \rangle])e^{hx} = e^{h[\langle X \rangle]}$ .

$$\begin{aligned}
 H_{[X]}(h) &= \sum_{[X]} P([X]|\{p\})e^{h[X]} = \sum_{[X]} \sum_{x_1, \dots, x_T} p(x_1, \dots, x_T|\{p\})\delta([X], \frac{\sum x_i}{T})e^{h[X]} \\
 &= \sum_{x_1, \dots, x_T} p(x_1, \dots, x_T|\{p\})e^{h\frac{\sum x_i}{T}} = \sum_{x_1, \dots, x_T} \prod_{i=1}^T P(x_i|p_i)e^{h\frac{x_i}{T}} = \prod_{i=1}^T \sum_x P(x|p_i)e^{h\frac{x}{T}} \\
 &= \prod_{i=1}^T G_{x|p_i}\left(\frac{h}{T}\right) = \prod_{i=1}^T \exp\left(\log\left(G_{x|p_i}\left(\frac{h}{T}\right)\right)\right) = \exp\left(\sum_{i=1}^T \log\left(G_{x|p_i}\left(\frac{h}{T}\right)\right)\right) \\
 &\simeq \exp\left(\sum_{i=1}^T \frac{h}{T} \langle X \rangle\right) = e^{h[\langle X \rangle]},
 \end{aligned} \tag{11}$$

where to get the last row we used the fact that  $\log G_x\left(\frac{h}{T}\right)$  is the generating function of the cumulants of  $x$ , therefore when  $T \gg 1$  we can expand it as  $\frac{h}{T} \langle X \rangle + \frac{1}{2} \left(\frac{h}{T}\right)^2 \text{var}(X) + \dots$  and we cut the expansion after the first term.

## 5 Expected value of $\Phi_i^{a,b}$ under Gamma fluctuations

The expected value of the dissimilarity of OTU  $i$  across two individuals  $a$  and  $b$  can be obtained by taking the expected value of

$$\Phi_i^{a,b}(t, T) = \left( \frac{\lambda_i^a(t) - \lambda_i^b(t+T)}{\lambda_i^a(t) + \lambda_i^b(t+T)} \right)^2, \tag{12}$$

where the abundances  $\lambda_i^a$  and  $\lambda_i^b$  are independent Gamma distributed random variables with different parameters,  $(K_a, \sigma_a)$  and  $(K_b, \sigma_b)$ . The expected value can be derived analytically with Wolfram

Mathematica, and yields

$$\begin{aligned}
E(\Phi_i^{a,b}) = f(K_1, K_2, \sigma_1, \sigma_2) = & -\frac{1}{K_2^2(1-\sigma_2)\sigma_2^3} \left[ \sigma_2^2 \left( -K_1^2(\sigma_1-2) - 2K_1K_2(\sigma_1-2)(\sigma_2-1) \right. \right. \\
& + K_2^2(\sigma_2-2)(\sigma_2-1) \left. \left. + \frac{2}{\sigma_1^2} \left( \frac{K_2\sigma_2}{K_1\sigma_1} \right)^{2/\sigma_1} \Gamma \left( 2 \left( \frac{1}{\sigma_1} + \frac{1}{\sigma_1} - 1 \right) \right) \right) \right. \\
& \times \left( \sigma_1(\sigma_2-2)[-2K_1K_2(\sigma_1-2)(\sigma_1-\sigma_2)(\sigma_2-1) + K_1^2(\sigma_1-2)(\sigma_1\sigma_2 - \sigma_1 - \sigma_2) \right. \\
& + 2K_2^2(\sigma_2-1)(\sigma_1\sigma_2 - \sigma_1 - \sigma_2)] {}_2F_1 \left( \frac{2}{\sigma_1}, \frac{2}{\sigma_1} + \frac{2}{\sigma_2} - 1; \frac{2}{\sigma_1} + \frac{2}{\sigma_2}; 1 - \frac{K_2\sigma_2}{K_1\sigma_1} \right) \frac{1}{\Gamma(2/\sigma_1 + 2/\sigma_2)} \\
& - 2\sigma_2(K_1^2(\sigma_1-2)((\sigma_1\sigma_2 - \sigma_1 - \sigma_2) + 2K_1K_2(\sigma_1-2) - 2 + (\sigma_2-1) \\
& + 2K_2^2(\sigma_1 + \sigma_1(\sigma_2-2)\sigma_2^2 + \sigma_2(-3 + (5-2\sigma_2)\sigma_2))) \\
& \left. \left. \times {}_2F_1 \left( \frac{2}{\sigma_1} + 1, \frac{2}{\sigma_1} + \frac{2}{\sigma_2} - 1; \frac{2}{\sigma_1} + \frac{2}{\sigma_2}; 1 - \frac{K_2\sigma_2}{K_1\sigma_1} \right) \frac{1}{\Gamma(2/\sigma_1 + 2/\sigma_2)} \right) \right], \tag{13}
\end{aligned}$$

where  ${}_2F_1$  is the ordinary Hypergeometric function.

## 6 Results are robust to variation of the threshold slope used to identify increasing $\Phi_i(T)$

For the results shown in Figures 2C and D and S5C, we identified OTUs with increasing  $\Phi_i(T)$  by using a threshold slope different for each individual (see Methods). Results remain qualitatively similar if we use a common threshold for all individuals, defined as the median of the individual thresholds, see Fig. S2. The main differences are seen for individuals A before travel and B after Salmonella, as they have an individual threshold that is much larger than the median threshold.

## 7 Results are robust to variation of the threshold value of $D_+$ and $D_-$ used to identify jumps of $K$

The threshold value of  $D_+$  and  $D_-$  ( $D_{thres} = 40$ ) used in the main text to identify jumps of the carrying capacity  $K$  was chosen based on a good trade-off between false-positive and false-negative identifications, as judged by eye-inspection. However, results are qualitatively similar if the threshold is varied between 30 and 70, see Fig. S3.

## 8 Variance of the carrying capacity variability $\zeta$

We hypothesized that the carrying capacity of an OTU  $i$  can be modelled as

$$K_i = \bar{K}_i \zeta, \tag{14}$$

where  $\bar{K}_i$  is an OTU-specific carrying capacity and  $\zeta$  is a lognormal random variable with mean 1 and variance that is the same for all OTUs, independent from  $\bar{K}_i$ . To verify this assumption we computed  $\bar{K}_i$  and  $\text{var}(\zeta)$  for the OTUs that are present in all 10 individuals of BIO-ML. For each OTU, we obtained  $\bar{K}_i$  as the average of the  $K_i$  estimated in each individual. Then, inverting Eq. (14) we obtained 10 values of  $\zeta$  for each OTU, of which we computed the variance. The obtained variances are plotted in Fig. S4A against  $\bar{K}_i$ . Although the obtained variances display a pattern, with larger variances corresponding to intermediate carrying capacities, such pattern can be explained simply

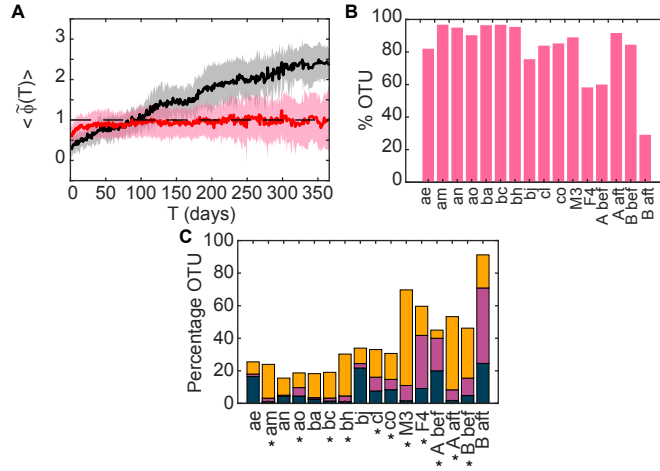

Figure S2: Robustness of results when the threshold slope used to identify increasing  $\Phi_i(T)$  is the median of the individual thresholds used in the main text. A) Average of  $\tilde{\Phi}(T)$  over OTUs with  $\tilde{\Phi}$  classified as flat (red curve) and increasing (black curve), for individual ‘bh’. Shaded areas represent one standard deviation intervals; B) Percentage of OTU whose  $\tilde{\Phi}(T)$  is classified as flat in each individual; C) Percentage of OTUs where we detect a jump in  $K$  and whose  $\tilde{\Phi}$  is increasing (orange bars), where we detect a jump in  $K$  but  $\tilde{\Phi}$  is flat (yellow bars) and where  $\tilde{\Phi}$  is increasing but we detect no jump in  $K$  (blue bars).

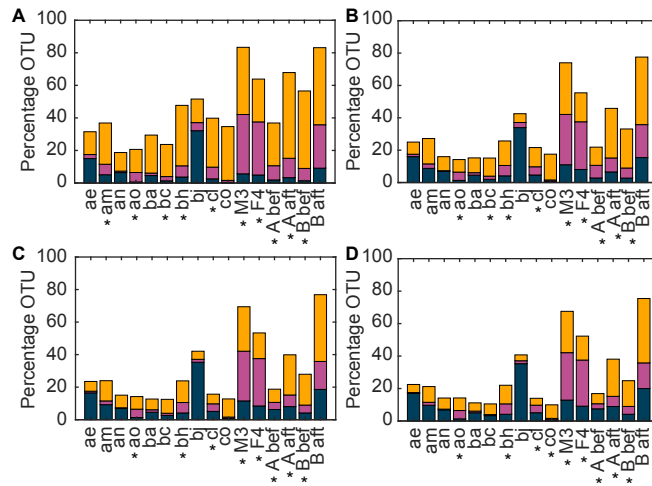

Figure S3: Robustness of results to variation of the threshold used to identify peak of  $D_+$  and  $D_-$ . Panels A-D: Percentage of OTUs where we detect a jump in  $K$  and whose  $\tilde{\Phi}$  is increasing (orange bars), where we detect a jump in  $K$  but  $\tilde{\Phi}$  is flat (yellow bars) and where  $\tilde{\Phi}$  is increasing but we detect no jump in  $K$  (blue bars), for four different value of the threshold: 30, 50, 60, 70.

by an observation bias. In fact, OTUs with low  $\bar{K}_i$  are observed in all 10 individuals only if  $\text{var}(\zeta)$  is sufficiently low, otherwise the  $K_i$  in some individuals will fall under the observation threshold. On the other hand, when  $\bar{K}_i$  is large the variance is bounded as  $K_i < 1$ . In fact, we can reproduce the empirical pattern from carrying capacities extracted from Eq. (14) with constant  $\text{var}(\zeta)$ . We extract 10000 values of  $\bar{K}_i$  from a lognormal distribution, and for each of these we compute 10 values of  $K_i$  using  $\text{var}(\zeta)=5$ . We mimic observation by keeping only the OTUs such that  $K_i > 10^{-5}$  in all 10 individuals. On these, we perform the same analysis performed on the empirical data. The results, in Fig. S4B, show a pattern similar to the one found in empirical data. Therefore, we conclude that the values of  $K_i$  observed in the data are compatible with the model in Eq. (14) with  $\text{var}(\zeta)$  independent of  $\bar{K}_i$ .

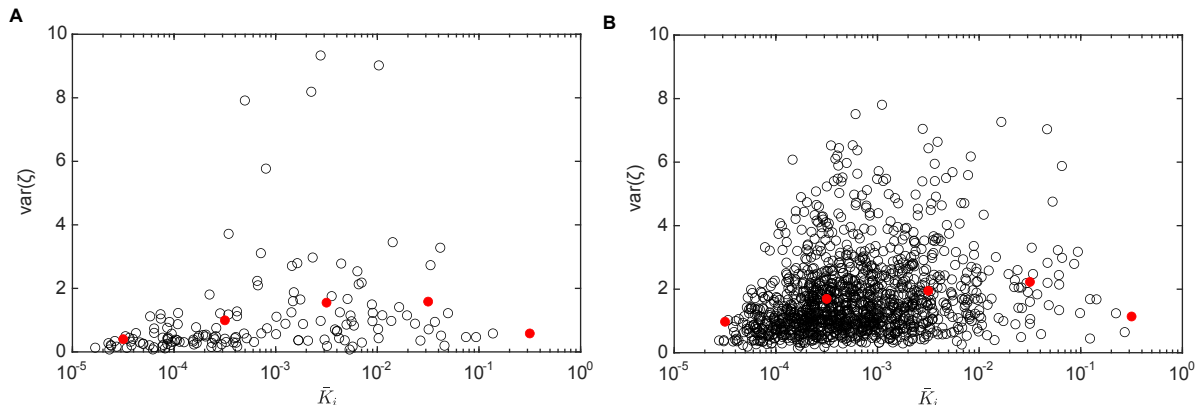

Figure S4: A) Variance of  $\zeta$  plotted against  $\bar{K}_i$  for OTUs common to the 10 individuals of BIO-ML. Each circle is an OTU. Red circles are the average in bins of logarithmic size; B) Relationship between  $\zeta$  and  $\bar{K}$  obtained from simulated data, according to Eq. (14).

## 9 Stochastic logistic model with switching carrying capacity

The model that we propose to describe the dynamics of the abundance of OTUs is a compound stochastic process: a stochastic logistic model whose carrying capacity itself evolves as a Markov process. The values that the carrying capacity assumes are distributed according to a lognormal, and are independent from the previous value of the carrying capacity and from the current value of the abundance. We can therefore see the compound process as a succession of stochastic logistic models with different carrying capacities, each of whom admits a (different) stationary distribution.

Concerning the stability of the compound process, we can refer to the literature related to “switched Markov processes”. Luo & Mao 2007 [24] show that a system of Lotka-Volterra equations with switching parameters and environmental white noise has a set of desirable properties: the population does not go to extinction with probability 1, it is stochastically ultimately bounded, and the second moment is also bounded. Our model is a sub-case of the one they consider, where we have a single logistic equation with environmental noise, and where only the carrying capacity switches, while the growth rate and the noise intensity remain always constant.

The only, yet essential, difference between the setting of [24] and ours is the fact that, in our case, the state space of the Markov process of the carrying capacity is infinite, while the literature on switched Markov process considers a finite state space. However, the choice of a finite state space does not affect the prediction of our model (and its ability to reproduce the statistical features of the data) provided that the number of values of  $K$  is large enough. More precisely, differences of  $K$  which are smaller than the typical variation of abundance due to environmental stochasticity



are negligible. One can for instance consider a finite set of values of  $K$  randomly sampled from a Lognormal distribution, such that the difference between neighbouring values of  $K$  is small enough.

We also verified numerically (fig. S5) that the distribution  $P(\lambda, t)$  of the compound process, for  $t$  larger than the average time between switches of  $K$ , converges to the same distribution regardless of the initial conditions.

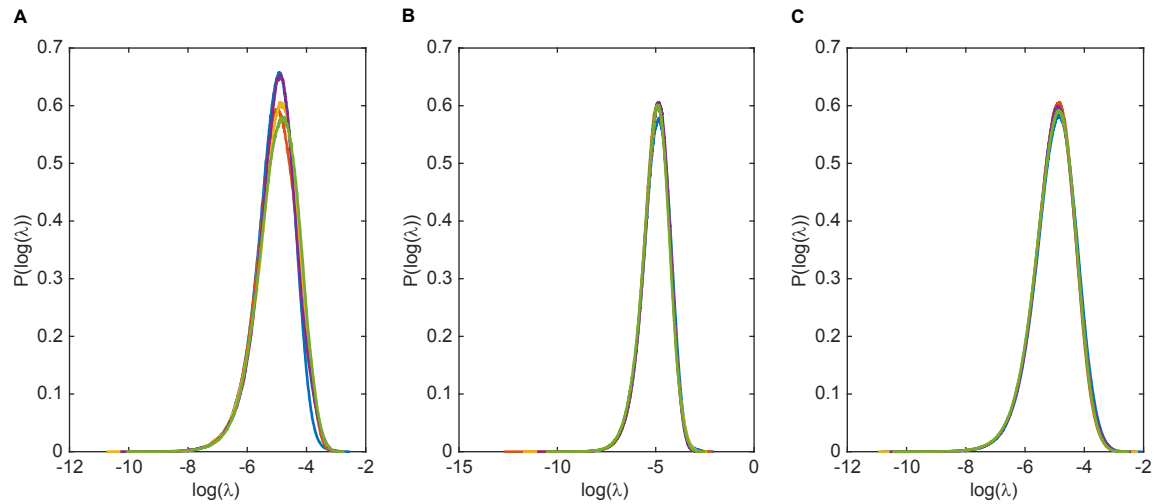

Figure S5: Distributions of the log-abundance  $P(\log(\lambda), t)$  of the compound process at times equal to 1 (A), 2 (B) and 3 (C) times the average time between two jumps of the carrying capacity. The different colors correspond to different initial conditions.

## Supplementary figures and tables

|    |         |               |         |
|----|---------|---------------|---------|
| ae | 0.6439  | cl            | 0.0000* |
| am | 0.0341* | co            | 0.2162  |
| an | 0.8546  | M3            | 0.0001* |
| ao | 0.0000* | F4            | 0.0000* |
| ba | 0.2872  | A bef. travel | 0.0000* |
| bc | 0.0094* | A aft. travel | 0.0008* |
| bh | 0.0009* | B bef. Salm.  | 0.0001* |
| bj | 0.7376  | B aft. Salm.  | 0.9248  |

Table S1: P-values of hypergeometric test. Values with a \* reject the null hypothesis that OTUs with transitions in the parameter  $K$  are not over-represented among OTUs with increasing  $\Phi(T)$ .

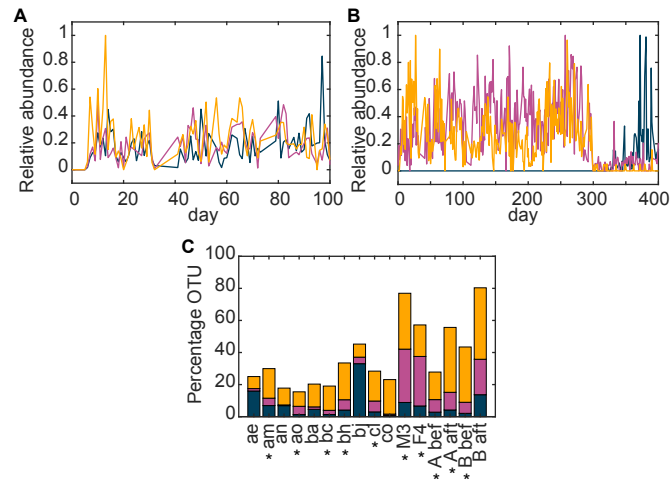

Figure S6: A and B: Examples of abundance time-series from individual 'M3' of the dataset Moving Pictures displaying sudden jumps in relative abundance, respectively, around day 5 and around day 300 (compare with corresponding peaks in Fig. S9); C) Percentage of OTUs where we detect a jump in  $K$  and whose  $\Phi$  is increasing (orange bars), where we detect a jump in  $K$  but  $\Phi$  is flat (yellow bars) and where  $\Phi$  is increasing but we detect no jump in  $K$  (blue bars).

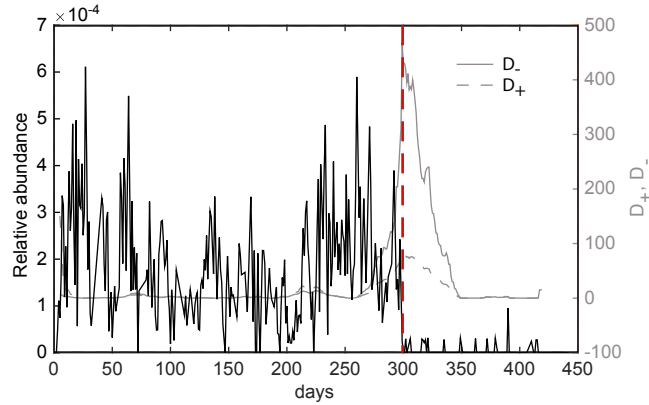

Figure S7: Example of our method to identify jumps in the abundance time series. A time series is plotted in black, and the corresponding  $D_+$  and  $D_-$  are plotted in grey. Both have a peak ( $D > 40$ ) when the relative abundance has a sudden jump. The position of the peak (red dashed line) correctly identifies the jumping time.

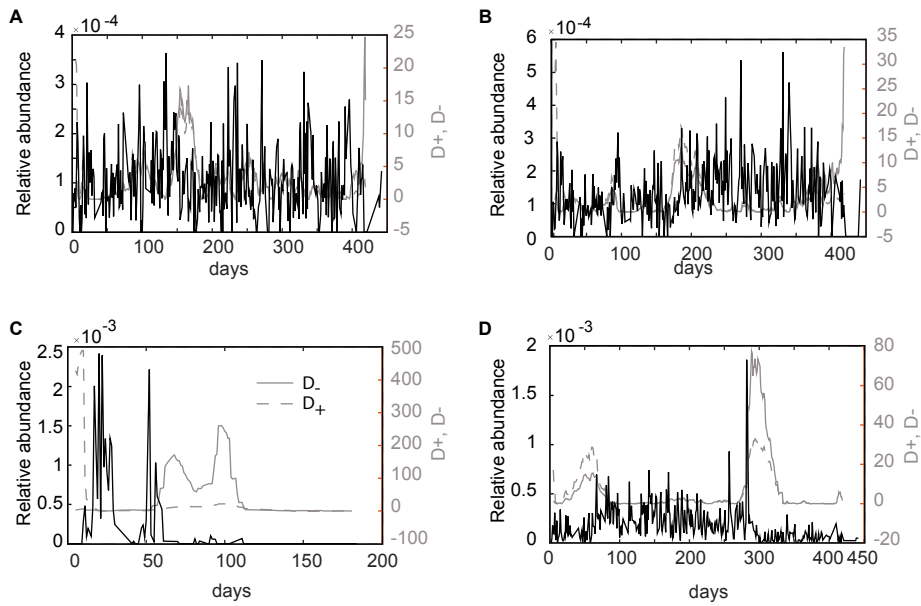

Figure S8: Examples of cases where  $\Phi(T)$  is increasing even though no jump in  $K$  is detected (A and B), or viceversa (C and D). A) No jump in relative abundance can be seen,  $\Phi(T)$  has a positive slope due to noise; B) There is a jump in  $K$  but the peaks of  $D$  are lower than the threshold we set ( $D = 40$ ); C) Two jumps in  $K$  are detected, however  $\Phi(T)$  is flat; D) One jump in  $K$  is detected, however the change in relative abundance is small and does not yield a significant slope in  $\Phi(T)$ .

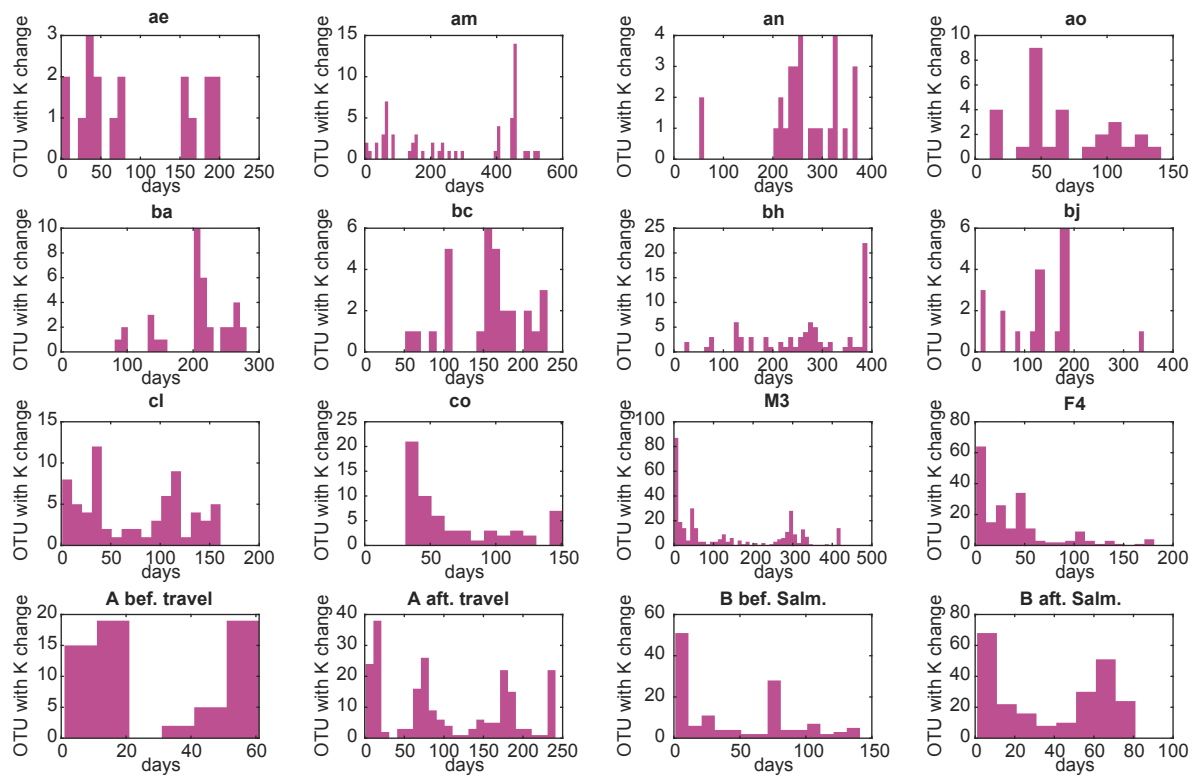

Figure S9: Histograms of times at which we detect a jump in the carrying capacity  $K$  for all individuals.

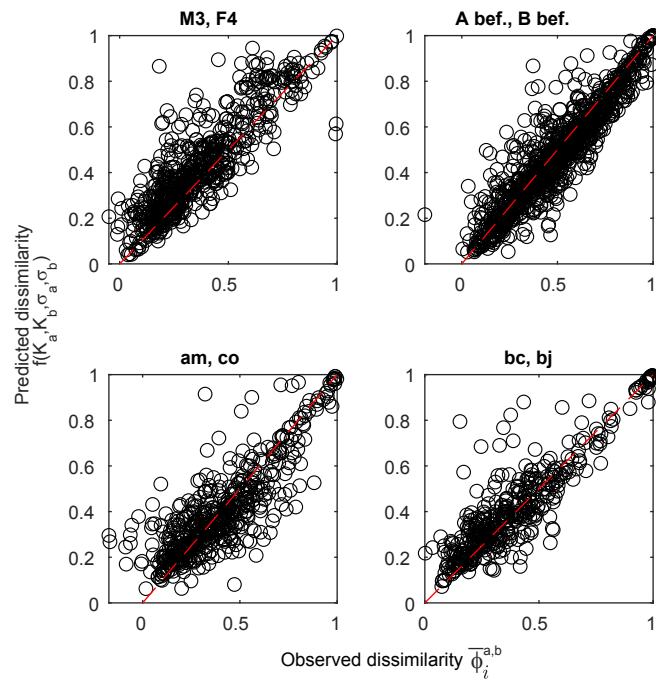

Figure S10: Comparison of the observed dissimilarity  $\bar{\Phi}_i^{a,b}$  of OTU  $i$  between a pair of individuals  $a$  and  $b$  with its theoretical expected value  $f(K_a, K_b, \sigma_a, \sigma_b)$  computed with the individual parameters estimated for each individual. Each point represents an OTU. Pairs (M3, F4), (A bef., B bef), (am,co), (bc,bj) are shown, other pairs are similar.

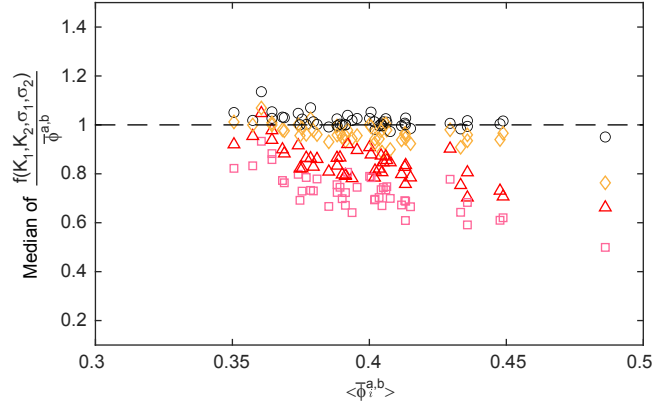

Figure S11: Median (over OTUs) of the ratio between the theoretical expectation for the dissimilarity of an OTU across two individuals,  $f(K_1, K_2, \sigma_1, \sigma_2)$ , and its empirical value  $\bar{\Phi}_i^{a,b}$ , plotted against  $\bar{\Phi}_i^{a,b}$ . The theoretical expected value captures typically all the observed dissimilarity  $\bar{\Phi}_i^{a,b}$  when individual-specific parameters are considered in the prediction (black circles,  $K_1 = K_a, K_2 = K_b, \sigma_1 = \sigma_a, \sigma_2 = \sigma_b$ ). The dissimilarity expected only from independent abundance fluctuations (pink squares,  $K_1 = K_2 = \bar{K}, \sigma_1 = \sigma_2 = \bar{\sigma}$ ) accounts typically for roughly 70% of the total dissimilarity. The percentage however varies, being larger in individuals that are more similar. The remaining  $\sim 30\%$  of the empirical dissimilarity is mostly explained by the differences in the parameter  $K$  across the two individuals (orange diamonds,  $K_1 = K_a, K_2 = K_b, \sigma_1 = \sigma_2 = \bar{\sigma}$ ), while the differences in the parameter  $\sigma$  has a smaller role (red triangles,  $K_1 = K_2 = \bar{K}, \sigma_1 = \sigma_a, \sigma_2 = \sigma_b$ ). Each point corresponds to a pair of individuals from the same dataset.

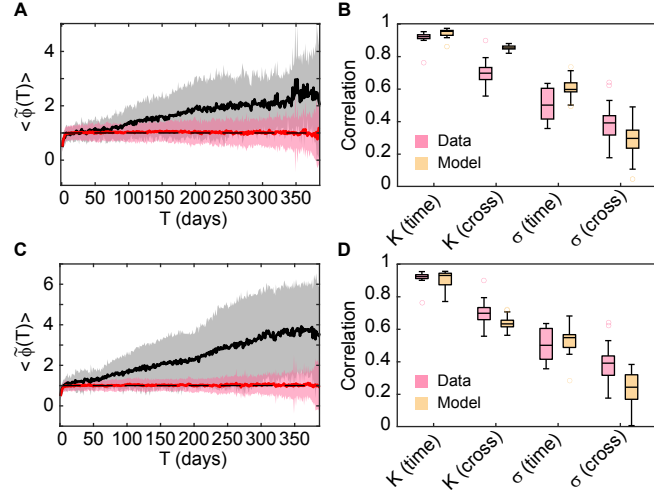

Figure S12: Comparison of model predictions with data, as in Fig. 4 of the main text, for two different values of  $\text{var}(\zeta)$ :  $\text{var}(\zeta) = 1$  in panels A and B,  $\text{var}(\zeta) = 10$  in panels C and D.

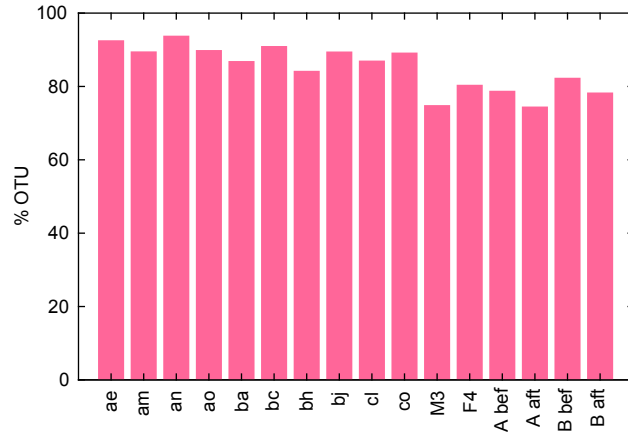

Figure S13: Percentage of OTU whose  $\tilde{\Phi}(T)$  is classified as flat in each individual for simulated time-series (to compare with empirical results in Fig. 2D).

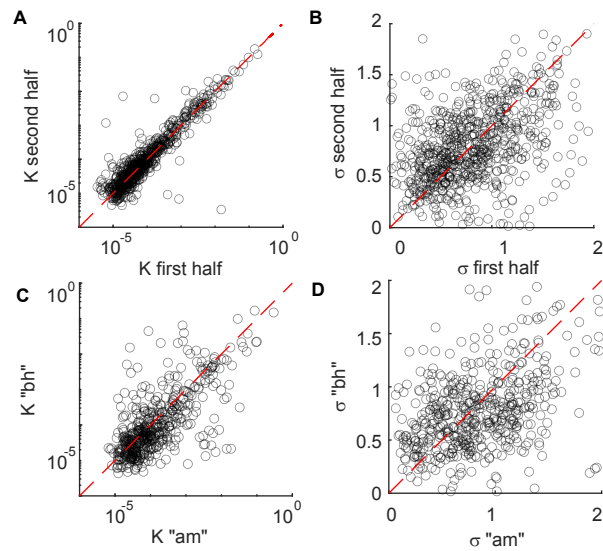

Figure S14: Example of consistency of parameters  $K$  and  $\sigma$  between two halves of a time-series and between two different individuals. A) and B): Scatter plots of, respectively, the carrying capacities  $K$  (A) and the noise intensities  $\sigma$  (B) estimated for each OTU on the first and second half of the time series of individual 'bh' from the dataset BIO-ML. Each point represents an OTU. The 1:1 line is shown as reference; C) and D): Scatter plots of, respectively, the carrying capacities  $K$  (C) and the noise intensities  $\sigma$  (D) estimated for each OTU in individuals 'am' and individual 'bh' from the dataset BIO-ML. Each point represents an OTU. The 1:1 line is shown as reference.
